# Supplementary material for: Oral fibropapillomatosis and epidermal hyperplasia of the lip in newborn lambs associated with bovine Deltapapillomavirus
Source: PubMed Central journal article supplement (PMC6127103; doi:10.1038/s41598-018-31529-9), 2018-09-06
Supplement: 41598_2018_31529_MOESM1_ESM.pdf [file 41598_2018_31529_MOESM1_ESM.pdf]

**Supplemental Table S1 - Table reports all primer sets used in this present study**

| <b>Bovine<br/>Deltapapillomavirus</b> | <b>Sequence</b>         | <b>bp</b> | <b>Amplicon<br/>size - bp</b> | <b>GenBank<br/>Acc.number</b> |
|---------------------------------------|-------------------------|-----------|-------------------------------|-------------------------------|
| L1 BPV1 F                             | GGCTGAGGACGCTGCTGGTA    | 20        | 92                            | KX907623.1                    |
| L1 BPV1 R                             | TCTCCGAGCCCCCTCTGGTC    | 20        |                               |                               |
| E5 BPV2 F                             | CACTGCCATTTGTTTTTTTC    | 20        | 154                           | MF045490.1                    |
| E5 BPV2 R                             | GGAGCAACTCAAATGATCCC    | 20        |                               |                               |
| E5 BPV13 F                            | CACTGCCATTTGGTGTTCTT    | 19        | 153                           | KU519390.1                    |
| E5 BPV13 R                            | AGCAGTCAAATGATCCCAA     | 20        |                               |                               |
| L1 BPV14 F                            | GGAACAAACCTCACAATCAC    | 20        | 195                           | KR868228.1                    |
| L1 BPV14 R                            | CCAGTTCTCTAATACTGAGG    | 20        |                               |                               |
| <b>OrfV</b>                           |                         |           |                               |                               |
| 045F                                  | CCTACTTCTCGGAGTTCAGC    | 20        | 392                           | KP010354.1                    |
| 045R                                  | GCAGCACTTCTCCTCGTAG     | 19        |                               |                               |
| PPP1                                  | GTCGTCCACGATGAGCAGCT    | 20        | 594                           | KU884329.1                    |
| PPP4                                  | TACGTGGGAAGCGCCTCGCT    | 20        |                               |                               |
| VIR1                                  | ACAATGGCCTGCGAGTG       | 17        | 617                           | AJ222702.1                    |
| VIR2                                  | TTAGAACTGATGCCGCAG      | 18        |                               |                               |
| PPV F                                 | CATCCCCAAGGAGACCAACGAG  | 22        | 627                           | KP010355.1                    |
| PPV R                                 | TCCTCGTCGCCGTCGAAGTC    | 20        |                               |                               |
| <b>Ovine Papillomavirus</b>           |                         |           |                               |                               |
| OaPV1 F                               | ACCGTTATCTAGAATCGCCAGC  | 23        | 194                           | U83594.1                      |
| OaPV1 R                               | CTCGCCTGCGCACTATTGTT    | 20        |                               |                               |
| OaPV2 F                               | ACCGACACCTGTGACCAAAA    | 20        | 174                           | U83595.1                      |
| OaPV2 R                               | ACTGGTTAGGATCGGGGAGT    | 20        |                               |                               |
| OaPV3, L1 F                           | AACTGGACTTGTCTTCCATG    | 20        | 126                           | FJ796965                      |
| OaPV3, L1 R                           | AAAGACTCGGTATTGGGAGG    | 20        |                               |                               |
| OaPV3, E6 F                           | AAGCCCTCGTACAATAGCTG    | 20        | 150                           | FJ796965                      |
| OaPV3, E6 R                           | GCCAAATCTCCAGAGTAAAGC   | 20        |                               |                               |
| OaPV4 F                               | CCAAGATGCTGAGCAGTAAATCC | 24        | 377                           | KX954121.1                    |
| OaPV4 R                               | TTATGGCTATTTGGTCCGTGC   | 21        |                               |                               |

Oral fibropapillomatosis and epidermal hyperplasia of the lip  
in newborn lambs associated with bovine Deltapapillomavirus -  
S Roperto, V Russo, F Corrado, F De Falco, JS Munday, F Roperto

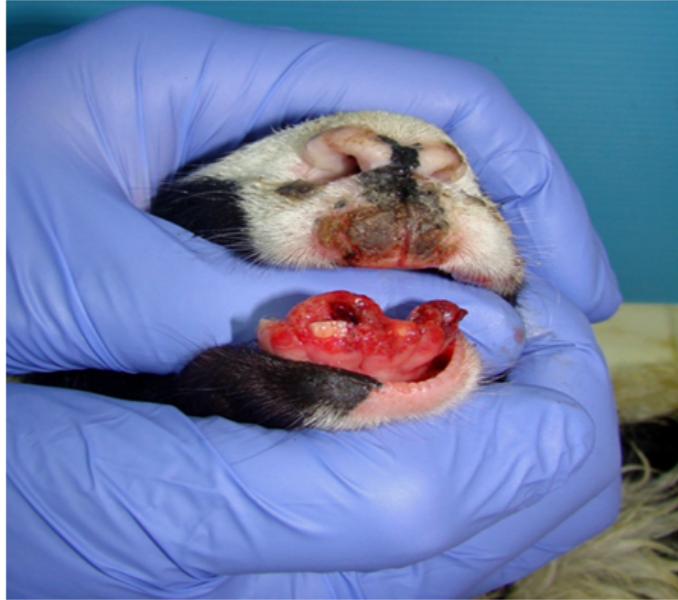

**Suppl. Figure S1.**

Clinical findings of epidermal hyperplasia of the lip and oral fibropapillomatosis of rostral mandibular gingiva of a newborn lamb.

Oral fibropapillomatosis and epidermal hyperplasia of the lip  
in newborn lambs associated with bovine Deltapapillomavirus -  
S Roperto, V Russo, F Corrado, F De Falco, JS Munday, F Roperto

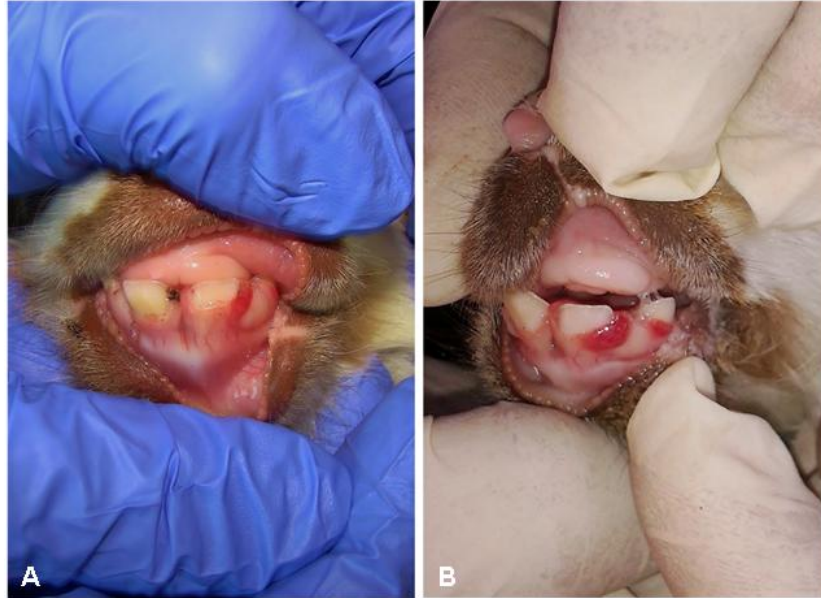

**Suppl. Figure S2.**

Gingival fibropapillomatosis in a lamb at 1 day of age (A) and 12 days later (B).

Oral fibropapillomatosis and epidermal hyperplasia of the lip  
in newborn lambs associated with bovine Deltapapillomavirus -  
S Roperto, V Russo, F Corrado, F De Falco, JS Munday, F Roperto

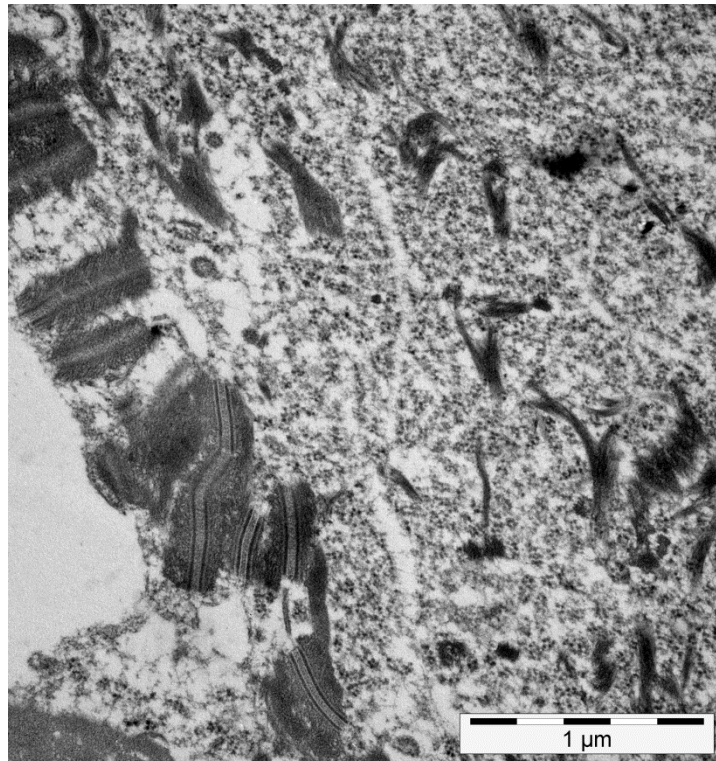

**Suppl. Figure S3.**

Several poorly developed desmosomes characterized by the lacking of the intermediate line are shown. Notice the presence of giant desmosomes.

Oral fibropapillomatosis and epidermal hyperplasia of the lip  
in newborn lambs associated with bovine Deltapapillomavirus -  
S Roperto, V Russo, F Corrado, F De Falco, JS Munday, F Roperto

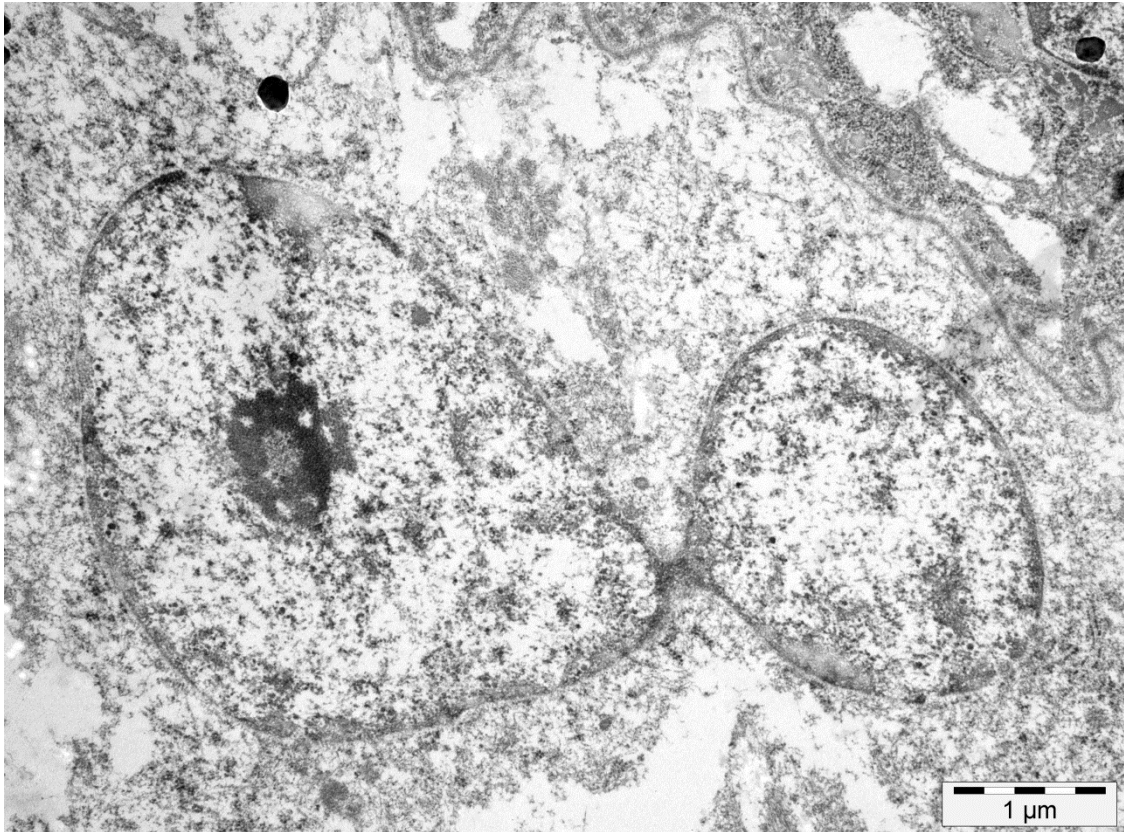

**Suppl. Figure S4.**

Oral fibropapillomatosis. An asymmetrical cell division giving rise to two daughter cells of unequal size is shown by TEM.

Oral fibropapillomatosis and epidermal hyperplasia of the lip  
in newborn lambs associated with bovine Deltapapillomavirus -  
S Roperto, V Russo, F Corrado, F De Falco, JS Munday, F Roperto

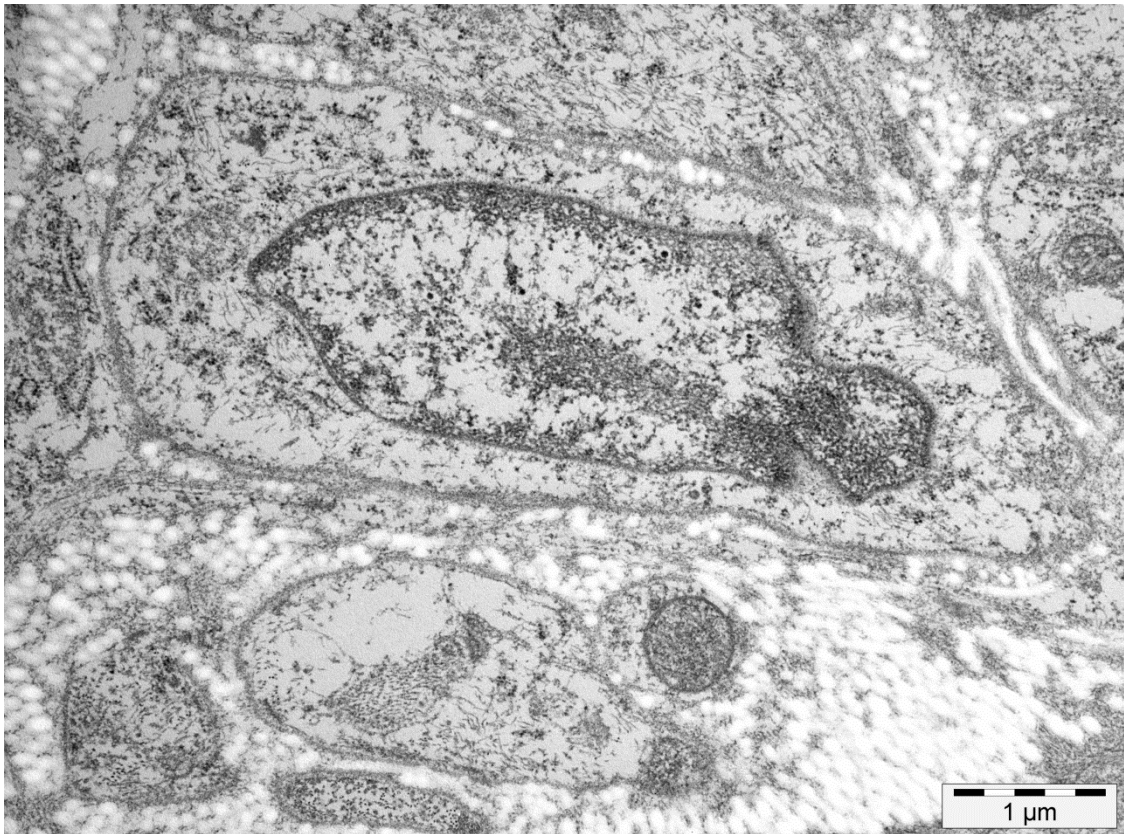

**Suppl. Figure S5.**

Epidermal hyperplasia. Ultrastructural detection of an asymmetric cell division resulting in the formation of micronuclei in the skin cells.

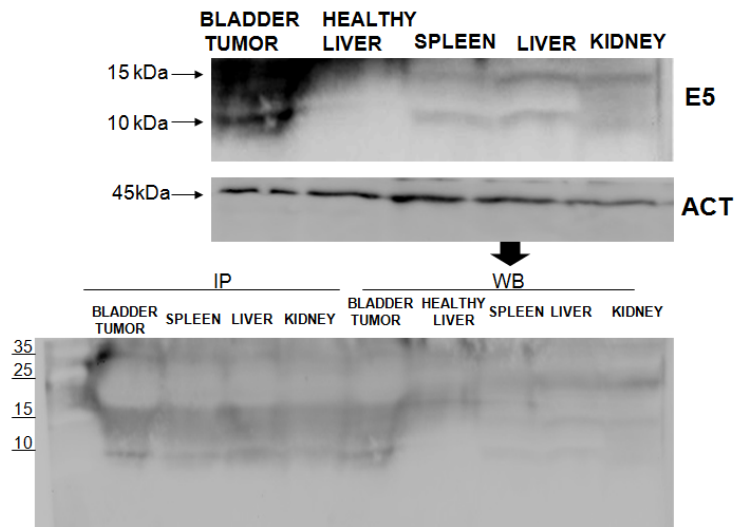

**Suppl. Figure S6.**

Immunoblotting of E5 oncoprotein in spleen, liver and kidney. Both E5 monomers (7kDa) and dimers (14 kDa) were evident in total extracts. Urothelial cancer cells expressing BPV-2 papillomavirus E5, were used as positive control; healthy liver tissue was used as negative control.

Actin protein levels were detected to ensure equal protein loading.



Oral fibropapillomatosis and epidermal hyperplasia of the lip  
in newborn lambs associated with bovine Deltapapillomavirus -  
S Roperto, V Russo, F Corrado, F De Falco, JS Munday, F Roperto

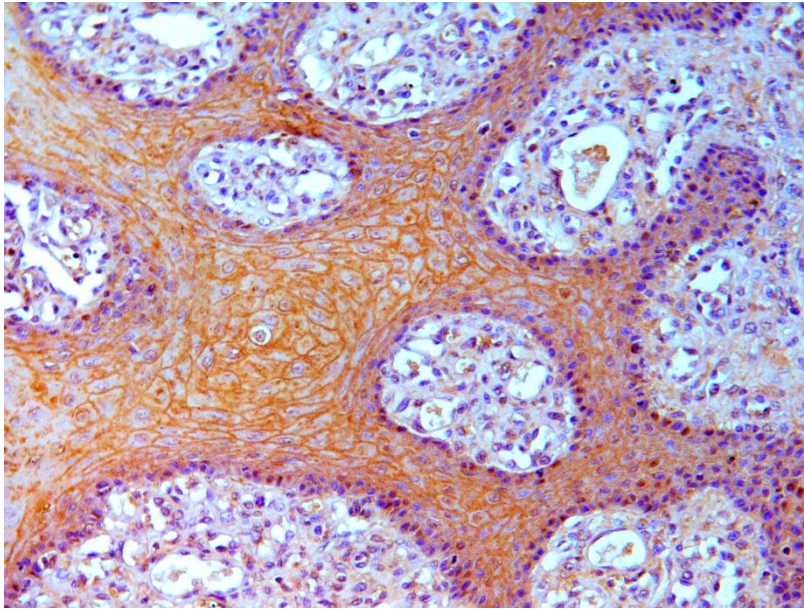

**Suppl. Figure S7.**

Oral fibropapillomatosis. A membranous pattern of E5 immunolabeling is clearly evident.



Oral fibropapillomatosis and epidermal hyperplasia of the lip  
in newborn lambs associated with bovine Deltapapillomavirus -  
S Roperto, V Russo, F Corrado, F De Falco, JS Munday, F Roperto

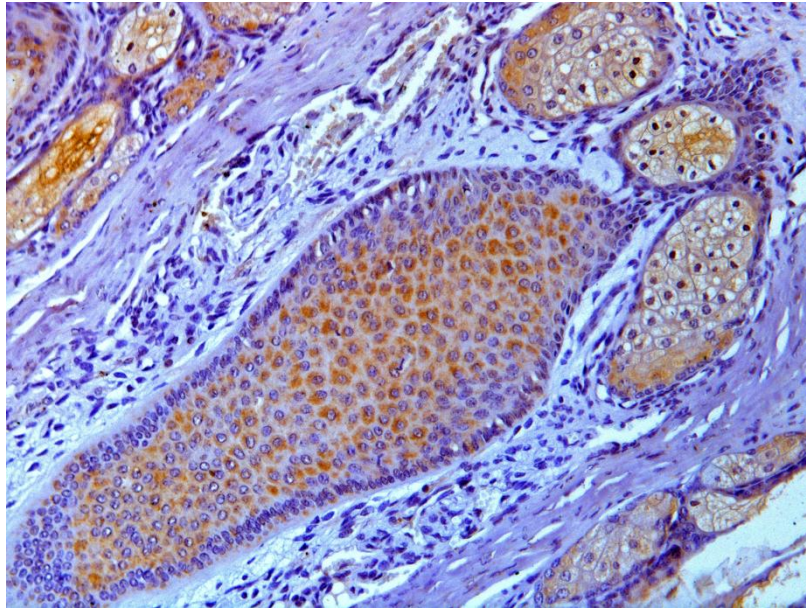

**Suppl. Figure S8.**

Epidermal hyperplasia. A strong E5 immunolabeling in acanthotic cells of the outer root sheath (OCS). Notice also E5 immunolabeling in the cells of sebaceous glands.
